# Supplementary material for: The Short-Chain Fatty Acid Receptor GPR43 Modulates YAP/TAZ via RhoA
Source: PubMed Central journal article supplement — Mol Cells. 2021 Jun 11;44(7):458–67. doi: 10.14348/molcells.2021.0021 (PMC8334349; doi:10.14348/molcells.2021.0021), 2021-06-11
Supplement: molce-44-7-458-supple.pdf [file molce-44-7-458-supple.pdf]

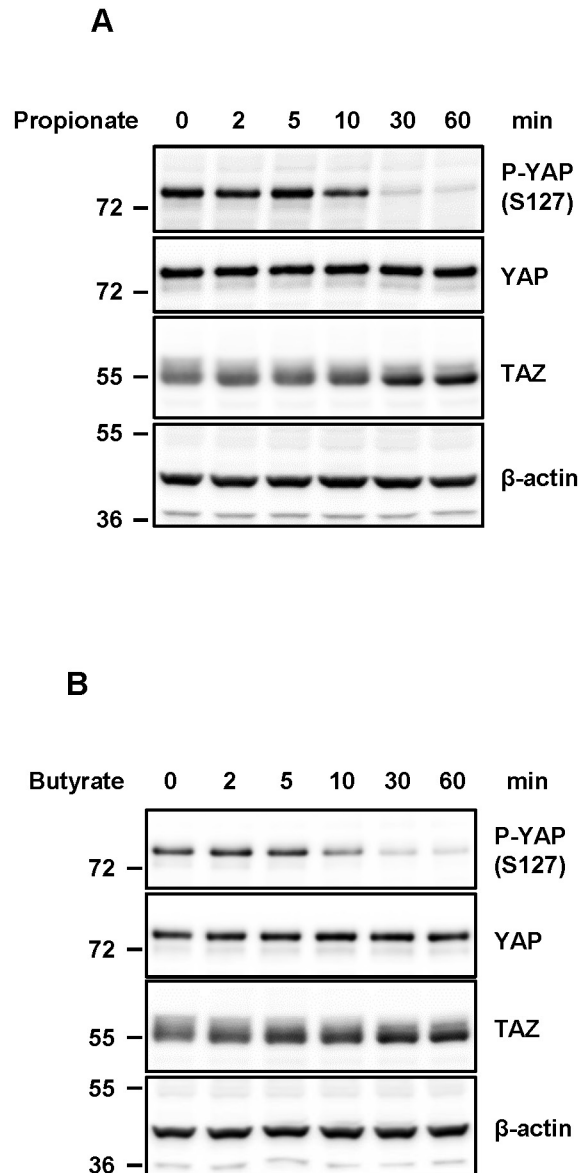

**Supplementary Fig. S1. Short-chain fatty acids induced dephosphorylation of YAP and stabilization of TAZ in GPR43-expressing cells.** hGPR43/HEK2993 cells were treated with (A) 10 mM propionate and (B) 10 mM butyrate for the indicated time-points. The lysates were subjected to Western blot as described in Materials and Methods section.

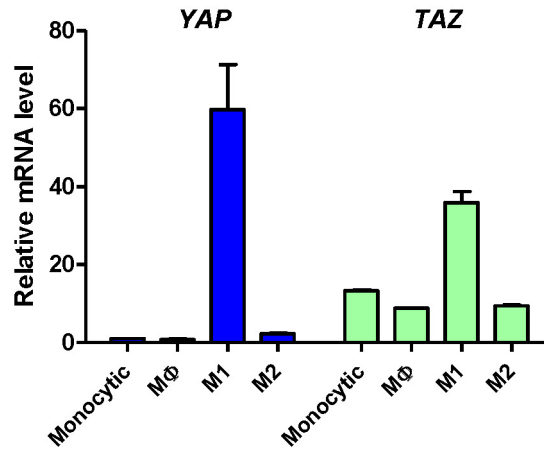

**Supplementary Fig. S2. The expression of YAP/TAZ was significantly enhanced in M1-like THP-1 cells.** THP-1 cells were differentiated to macrophage-like cells as described in Materials and Methods section. Total RNAs purified from the cells were used for qRT-PCR analysis. Data from at least two independent experiments are presented as mean  $\pm$  SEM.

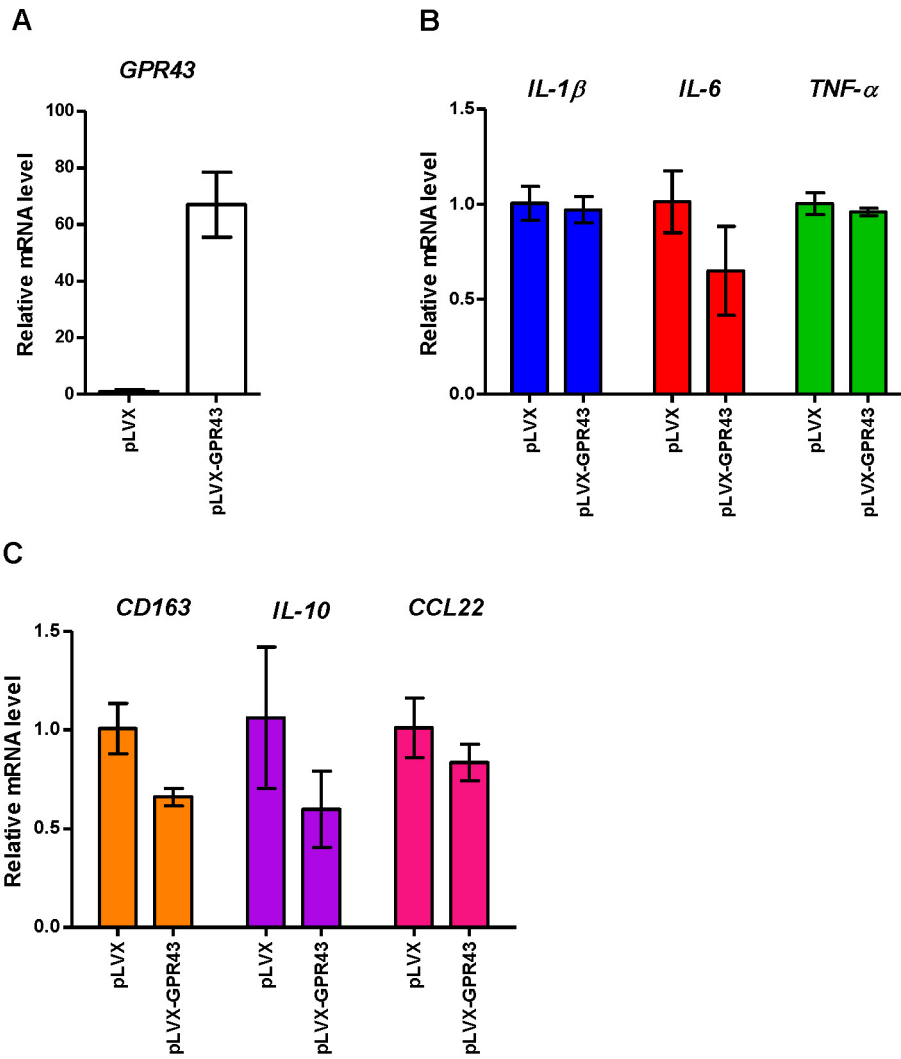

**Supplementary Fig. S3. Macrophage markers in human GPR43-overexpressing THP-1 cells.** (A) hGPR43 was overexpressed by lentiviral infection in monocytic THP-1 cells for 48 h. And then, qRT-PCR analysis was performed with the indicated (B) M1 marker and (C) M2 marker genes. Data from at least two independent experiments are presented as mean  $\pm$  SEM.

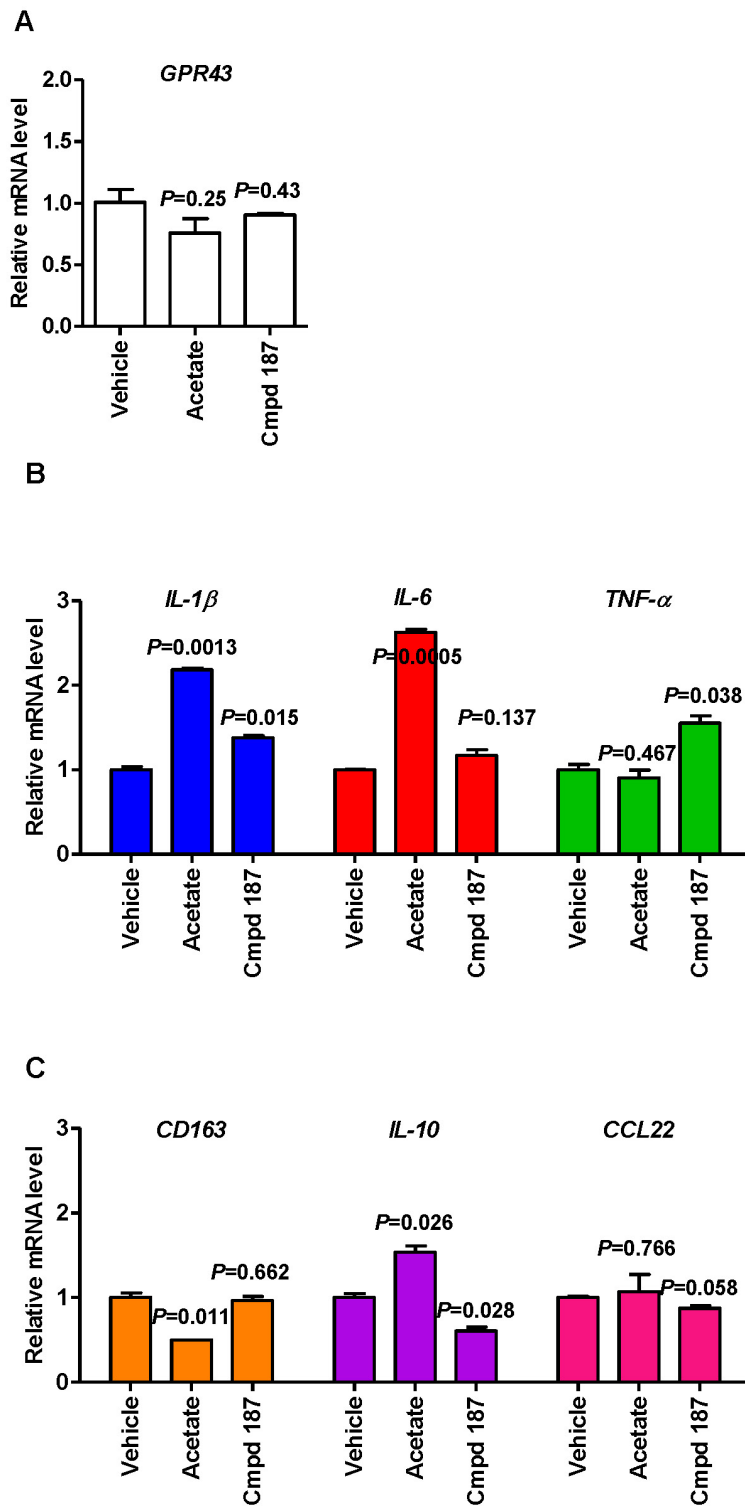

**Supplementary Fig. S4. Acetate and GPR43 agonist augmented some of M1 markers.** M $\phi$ -differentiated THP-1 cells were treated with 10 mM acetate and 10  $\mu$ M compound 187 for 24 h. Total RNAs were used for qRT-PCR of (A) GPR43, (B) M1 markers, and (C) M2 markers. Data from at least two independent experiments are presented as mean  $\pm$  SEM. The *P* values were calculated by Student's *t*-test.
